# Supplementary material for: Polymer-loaded hydrogels serve as depots for lactate and mimic “cold” tumor microenvironments
Source: Royal Society of Chemistry journal article supplement (doi:10.1039/d0bm01196g), 2020-01-01
Supplement: d0bm01196g1.pdf [file d0bm01196g1.pdf]

## SUPPLEMENTARY FIGURES

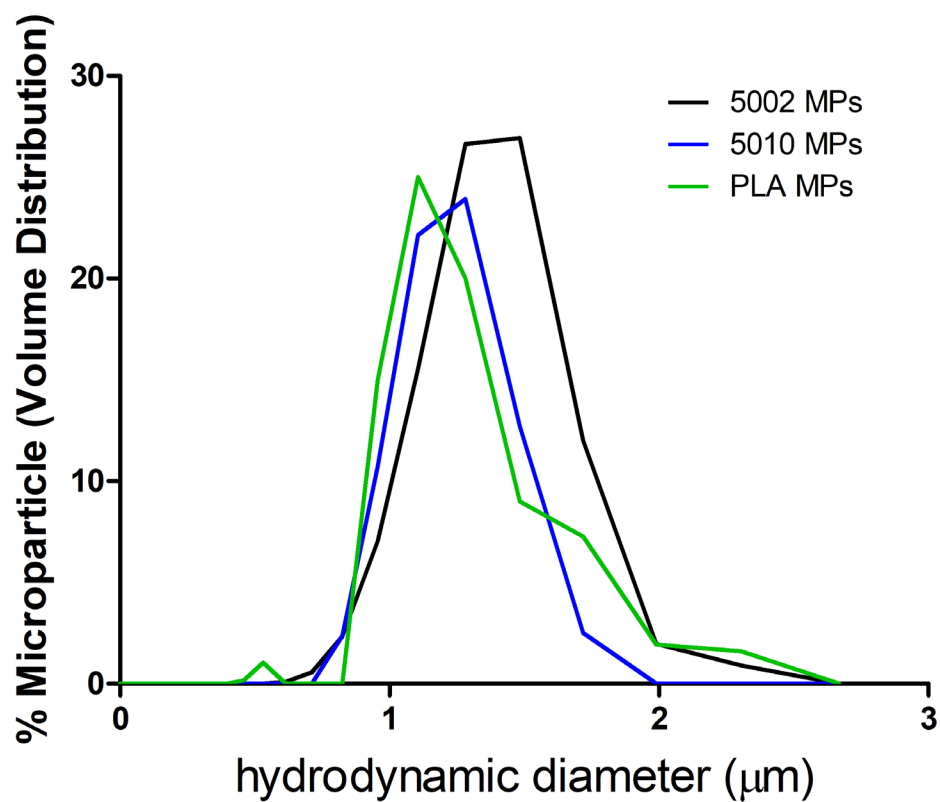

**Figure S1.** Size distribution (by volume) of fabricated MPs using Dynamic Light Scattering.

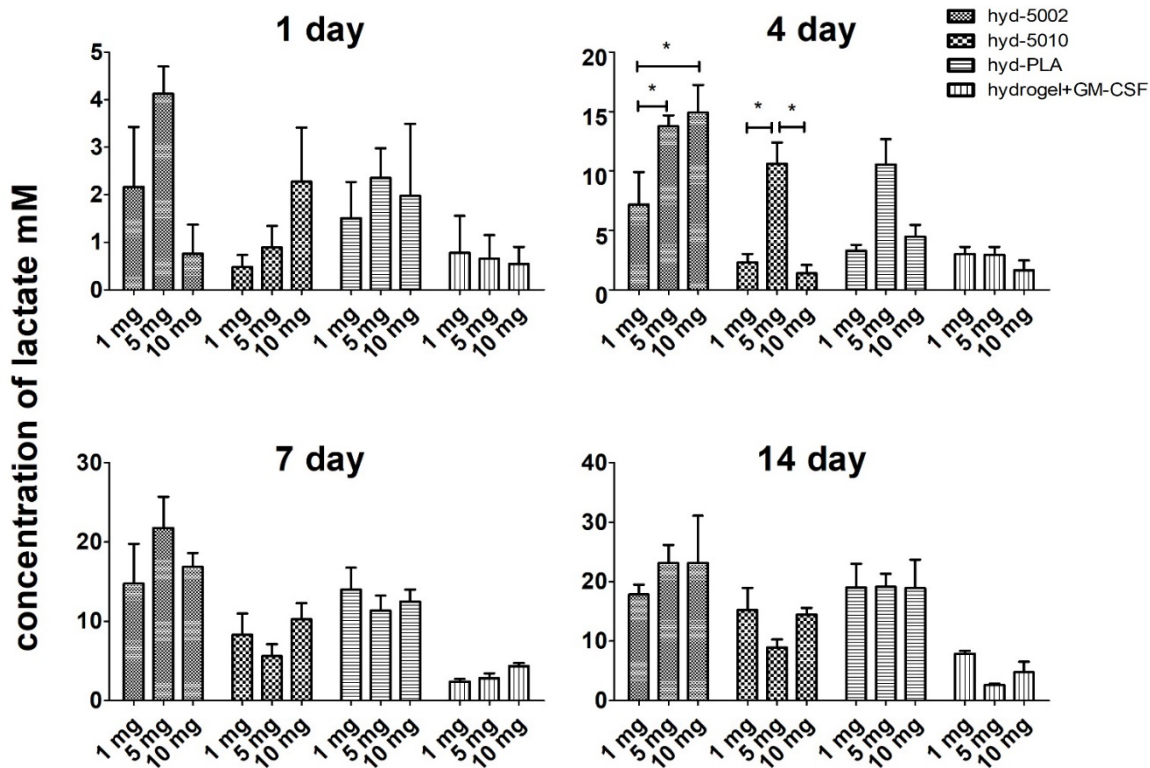

**Figure S2. Concentrations of lactate in the hydrogel increase over time.** This figure shows the same data as Figure 2, however, statistical significances are denoted between mass of particle from the same PLGA MP formulation. The \* symbol represents a pairwise significance difference ( $p < 0.05$ ;  $n = 3$  biological replicates per formulation per time point). Significance was determined using two-way ANOVA of the entire data set followed by comparisons of the means of each treatment group at each time point using a posthoc Tukey test.

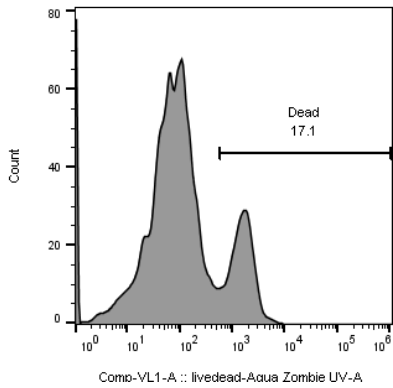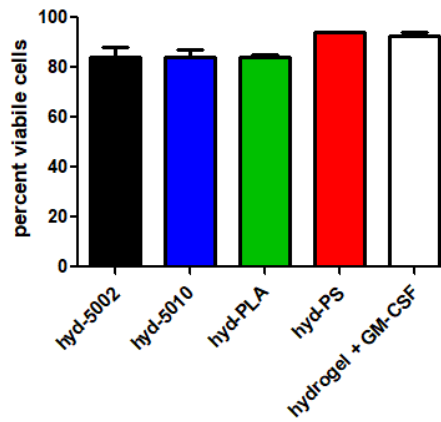

**Figure S3. Cells remain viable in the hydrogel after 14 days of incubation.** Cell viability within the hydrogel environment was measured after 14 days using a fixable Live/Dead dye and flow cytometric quantification. There were no significant difference in viability in cells that were cultured with hydrogels loaded with MPs and hydrogels without MPs.

# DCs

## FMO

## Experimental Sample

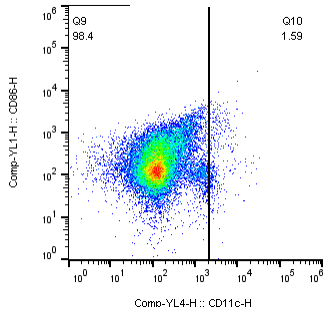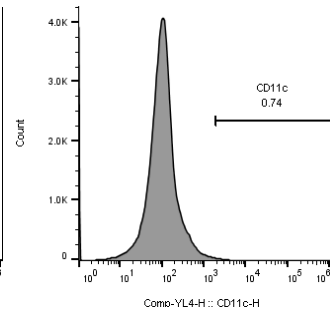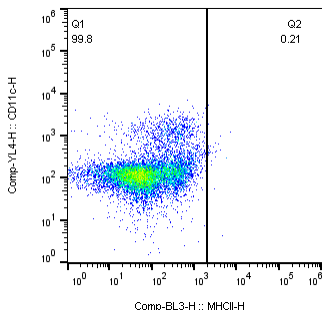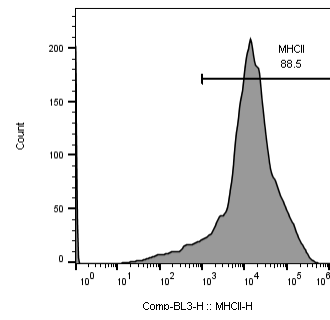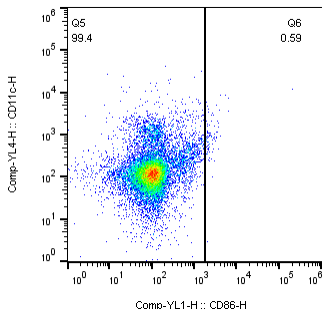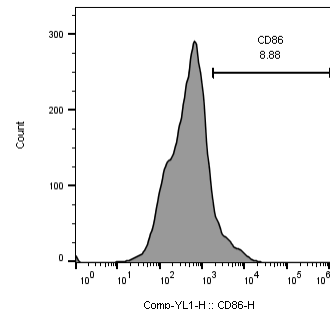

# MΦs

## FMO

## Experimental Sample

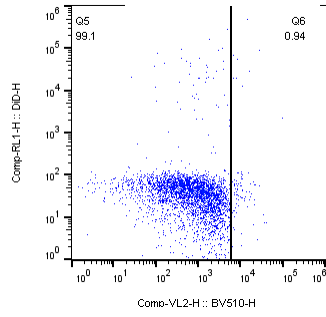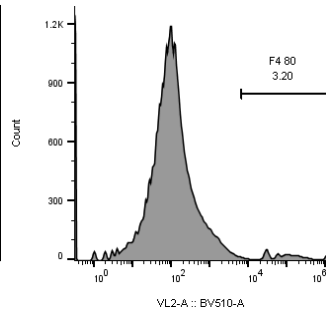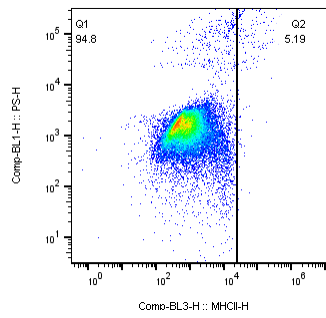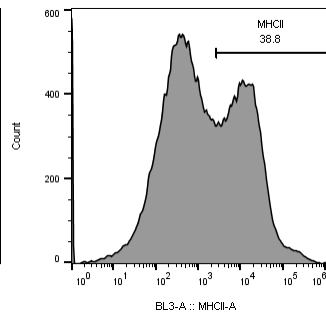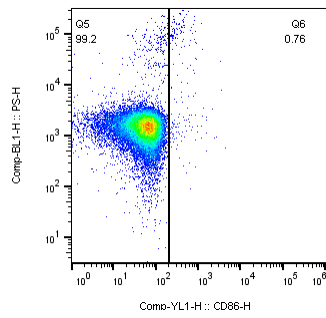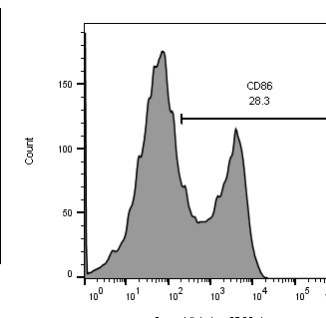

# B cells

## FMO

## Experimental Sample

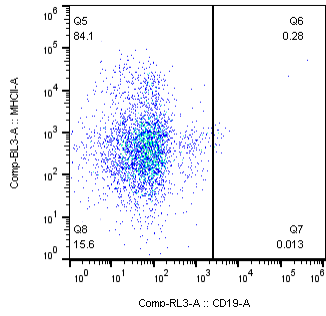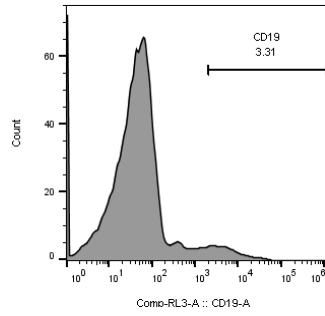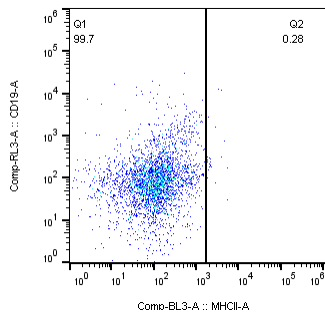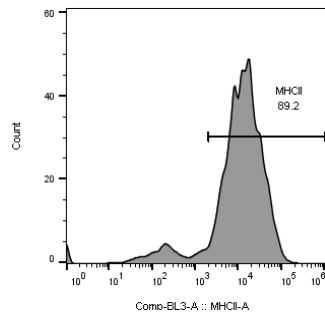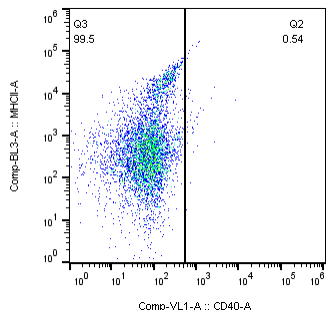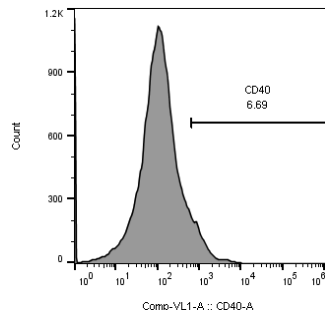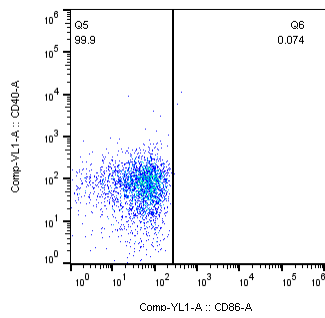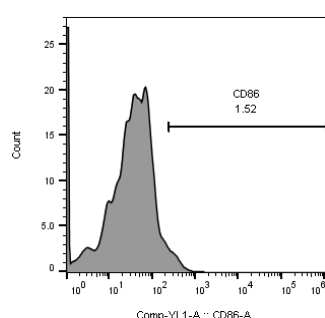

# T cells

## FMO

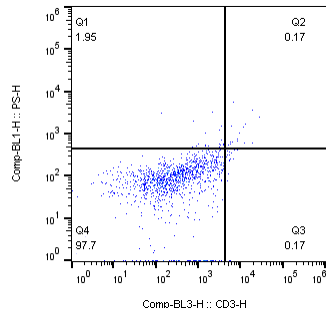

## Experimental Sample

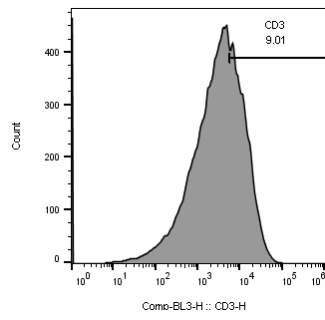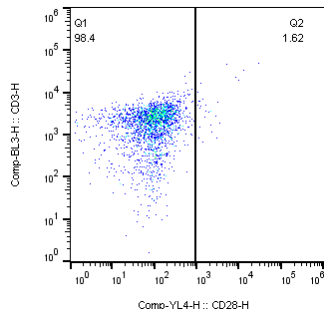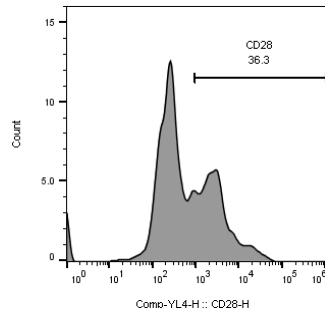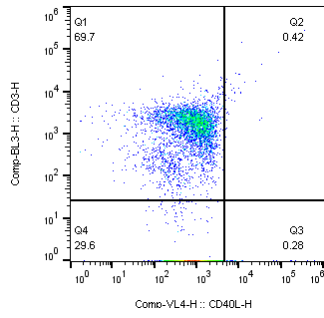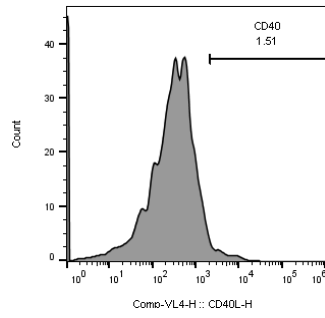

**Figure S4. Representative flow cytometry plots from immunophenotype studies.** The gating strategy for the data displayed in **Figure 4 and Figure 5** is shown. The percent expression of each marker was determined using Fluorescence Minus One (FMO) controls. Each sample was analyzed in the same manner.



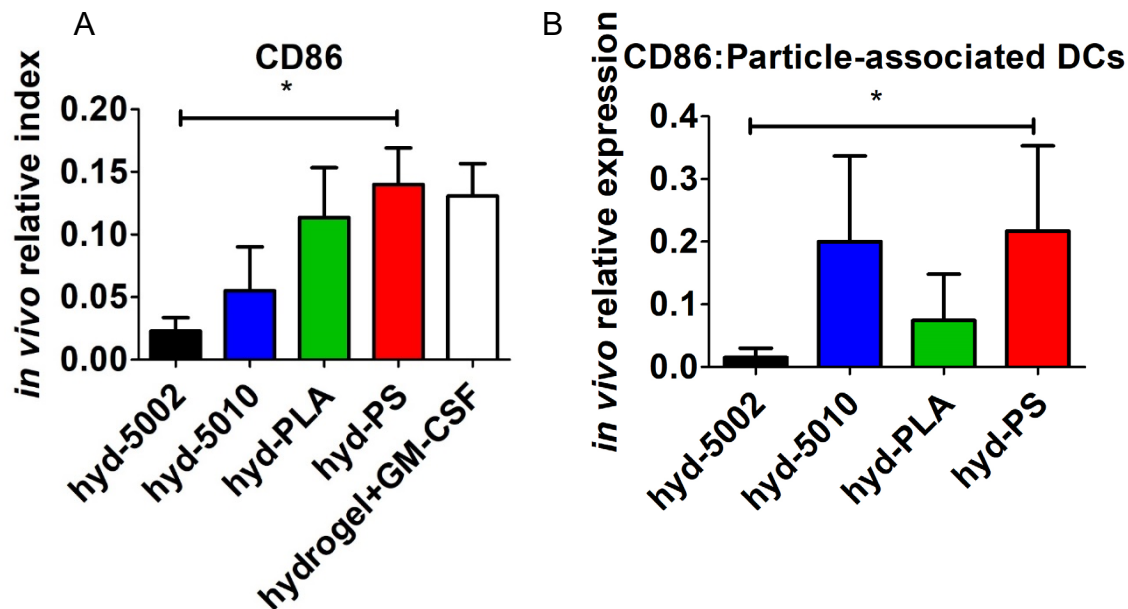

**Figure S5. Peptide hydrogel loaded with degradable PLGA MPs exert lasting immunophenotypic effects beyond the immediate injection area.** Dendritic cells in the inguinal lymph node, an immediate draining lymph node from the injection site, were phenotyped 7 days after the hydrogel injection. The *in vivo* relative index of CD86 expression on (A) DCs the iLN and (B) particle-associated DCs the iLN are shown. The \* symbol represents a pairwise significance difference ( $p < 0.05$ ;  $n = 3$  biological replicates per formulation per time point). Significance was determined using two-way ANOVA of the entire data set followed by comparisons of the means of each treatment group at each time point using a posthoc Tukey test.

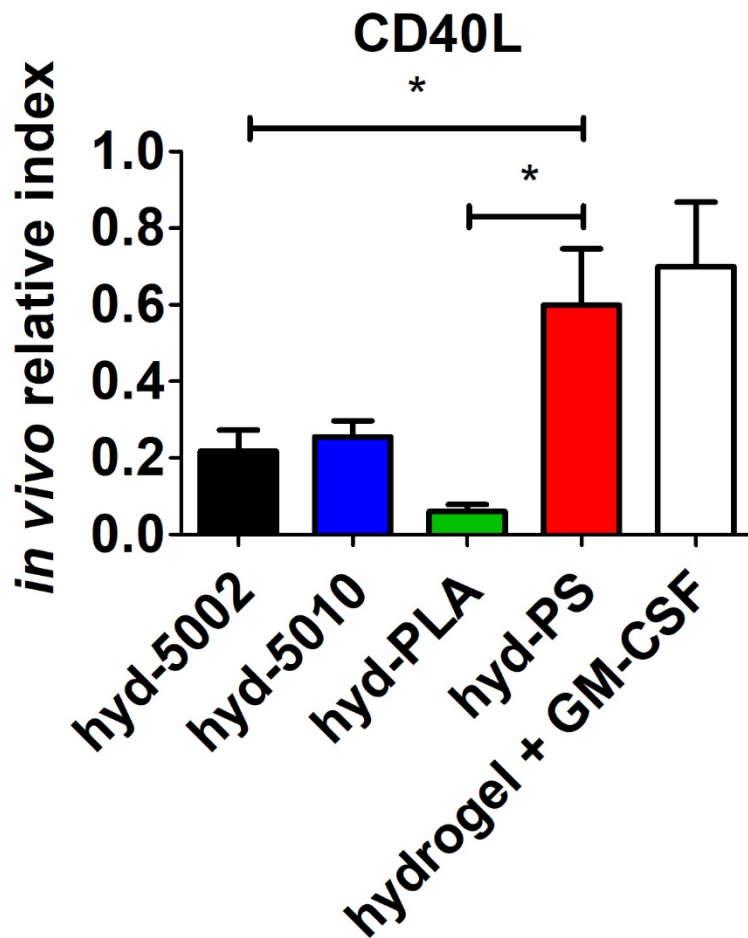

**Figure S6. Peptide hydrogel loaded with degradable PLGA MPs have lasting effects on adaptive cell beyond the immediate injection area.** T cells in the inguinal lymph node, an immediate draining lymph node from the injection site, were phenotyped 14 days after the hydrogel injection. The *in vivo* relative index of CD40L expression on T cells in the iLN is shown, The \* symbol represents a pairwise significance difference ( $p < 0.05$ ;  $n = 3$  biological replicates per formulation per time point). Significance was determined using two-way ANOVA of the entire data set followed by comparisons of the means of each treatment group at each time point using a posthoc Tukey test.
